# Supplementary material for: An Antiherpesviral Host-Directed Strategy Based on CDK7 Covalently Binding Drugs: Target-Selective, Picomolar-Dose, Cross-Virus Reactivity
Source: MDPI journal article supplement (doi:10.3390/pharmaceutics16020158), 2024-01-23
Supplement: s1 [file s1]

## Supplementary Material

# An antiherpesviral host-directed strategy based on CDK7 covalently binding drugs: target-selective, picomolar-dose, cross-virus reactivity

DongHoon Yu<sup>1,\*</sup>, Sabrina Wagner<sup>2,\*</sup>, Martin Schütz<sup>2</sup>, Yeejin Jeon<sup>1,&</sup>, Mooyoung Seo<sup>1,\$</sup>, Jaeseung Kim<sup>1</sup>, Nadine Brückner<sup>2,§</sup>, Jintawee Kicuntod<sup>2</sup>, Julia Tillmanns<sup>2</sup>, Christina Wangen<sup>2</sup>, Friedrich Hahn<sup>2</sup>, Benedikt B. Kaufer<sup>3</sup>, Frank Neipel<sup>2</sup>, Jan Eickhoff<sup>4</sup>, Bert Klebl<sup>4,5</sup>, Kiyeon Nam<sup>1</sup>, Manfred Marschall<sup>2,#</sup>

<sup>1</sup> Qurient Co. Ltd., C-dong, 242 Pangyo-ro, C801 Bundang-gu, Seongnam-si, Republic of Korea

<sup>2</sup> Institute for Clinical and Molecular Virology, Friedrich-Alexander-Universität Erlangen-Nürnberg (FAU), Schlossgarten 4, 91054 Erlangen, Germany

<sup>3</sup> Institute of Virology, Freie Universität Berlin, Robert-von-Ostertag-Straße 7-13, 14163 Berlin, Germany

<sup>4</sup> Lead Discovery Center GmbH, Otto-Hahn-Straße 15, 44227 Dortmund, Germany

<sup>5</sup> The Norwegian College of Fishery Science UiT, Arctic University of Norway, 9037 Tromsø, Norway

&,\$§ Present addresses: & Kanaph Therapeutics Inc., 112-901, 58, Mokgam-ro, Gwangmyeong-si, Republic of Korea; \$ Mitoimmune Therapeutics, 13th Floor, 108, Bongeunsa-ro, Gangnam-gu, Seoul, Republic of Korea; § University Hospital Tübingen, Functional Immunogenomics, Hoppe-Seyler-Straße 3, 72076 Tübingen, Germany.

\* These authors contributed equally to the study.

# Correspondence: manfred.marschall@fau.de, Tel.: +49-9131-8536096

**(A) QRS6-specific HPLC report**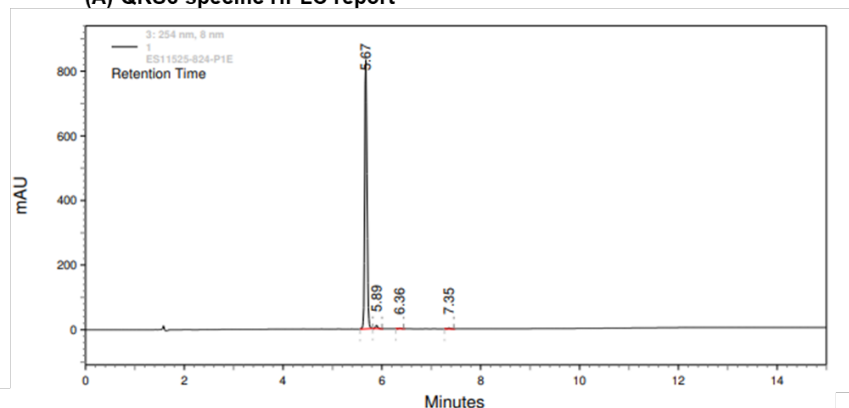

3: 254 nm, 8 nm

| Retention Time | Height | Area    | Area Percent |
|----------------|--------|---------|--------------|
| 5.67           | 832549 | 2625098 | 98.15        |
| 5.89           | 9850   | 31682   | 1.18         |
| 6.36           | 2245   | 8239    | 0.31         |
| 7.35           | 2953   | 9650    | 0.36         |

**(B) QRS7-specific HPLC report**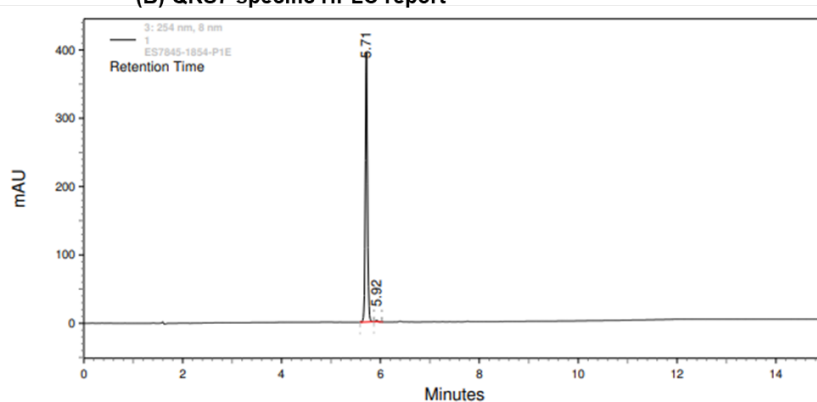

3: 254 nm, 8 nm

| Retention Time | Height | Area    | Area Percent |
|----------------|--------|---------|--------------|
| 5.71           | 394057 | 1210799 | 99.52        |
| 5.92           | 1920   | 5855    | 0.48         |

**(C) QRS9-specific HPLC report**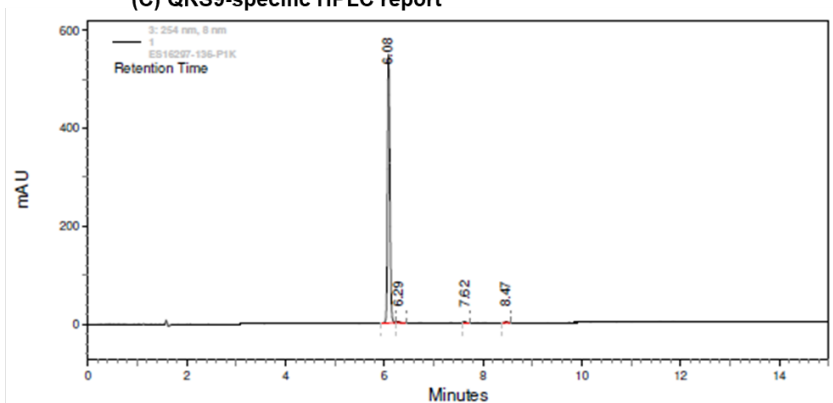

3: 254 nm, 8 nm

| Retention Time | Height | Area    | Area Percent |
|----------------|--------|---------|--------------|
| 6.08           | 547528 | 1748824 | 98.44        |
| 6.29           | 2098   | 8476    | 0.48         |
| 7.62           | 3296   | 9655    | 0.54         |
| 8.47           | 2296   | 9655    | 0.54         |

**Figure S1.** HPLC spectra used to determine the purity of the analyzed QRS compounds. Standard high performance liquid chromatography (HPLC) was performed to ensure the required purity of compounds. Spectra and measurement details are given for the compounds as indicated: **(A)** QRS6; **(B)** QRS7; **(C)** QRS9.
